# Supplementary material for: Total hip arthroplasty and femoral nail lengthening for hip dysplasia and limb-length discrepancy
Source: PubMed Central journal article supplement — Arthroplast Today. 2018 May 3;4(3):279–86. doi: 10.1016/j.artd.2018.03.001 (PMC6123321; doi:10.1016/j.artd.2018.03.001), 2018-05-03
Supplement: mmc5.pdf [file mmc5.pdf]

# INDIVIDUAL CONFLICT OF INTEREST STATEMENT

## *American Association of Hip and Knee Surgeons*

(Adopted from the American Academy of Orthopaedic Surgeons disclosure statement)

The following form **must be filled out completely and submitted by each author (example, 6 authors, 6 forms).** **All items require a response. If there is no relevant disclosure for a given item, enter "None."**

---

**Manuscript Title** TOTAL HIP ARTHROPLASTY AND FEMORAL NAIL LENGTHENING FOR HIP DYSPLASIA AND LIMB LENGTH DISCREPANCY

1. Royalties from a company or supplier (The following conflicts were disclosed)  
none
2. Speakers bureau/paid presentations for a company or supplier (The following conflicts were disclosed)  
none
- 3A. Paid employee for a company or supplier (The following conflicts were disclosed)  
none
- 3B. Paid consultant for a company or supplier (The following conflicts were disclosed)  
Smith & Nephew, Synthes, Nuvasive Orthopedics
- 3C. Unpaid consultants for a company or supplier (The following conflicts were disclosed)  
none
4. Stock or stock options in a company or supplier (The following conflicts were disclosed)  
none
5. Research support from a company or supplier as a Principal Investigator (The following conflicts were disclosed)  
none
6. Other financial or material support from a company or supplier (The following conflicts were disclosed)  
none
7. Royalties, financial or material support from publishers (The following conflicts were disclosed)  
none
8. Medical/Orthopaedic publications editorial/governing board (The following conflicts were disclosed)  
none
9. Board member/committee appointments for a society (The following conflicts were disclosed)  
none

**Each author must sign AND print or type his/her name, date and submit a separate form**

In addition, one BLINDED Conflict of Interest form (no author names used) should be submitted per manuscript with all author disclosures.

Mitchell Bernstein

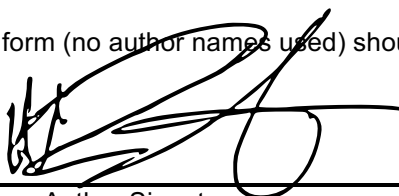

November 23, 2017

---

Author Name (Print or Type)

Author Signature

Date
